# Supplementary material for: The C-terminal dsRNA-binding domain of Drosophila Dicer-2 is crucial for efficient and high-fidelity production of siRNA and loading of siRNA to Argonaute2
Source: PubMed Central journal article supplement — RNA. 2017 Jul;23(7):1139–53. doi: 10.1261/rna.059915.116 (PMC5473147; doi:10.1261/rna.059915.116), 2017-07
Supplement: supp_059915.116_Supplemental_Table_S1.pdf [file supp_059915.116_Supplemental_Table_S1.pdf]

**Supplemental Table S1. Sequencing statistics for small RNAs from fly heads**

| Genotype                                                                                                       | Total reads | rRNA mapping reads | MicroRNA hairpin-mapping reads | Genome mapping reads (-rRNA; +miRNA hairpin) | Genome mapping reads (-rRNA; -miRNA hairpin) | Genome unique mapping reads (-rRNA; +miRNA hairpin) | Genome unique mapping reads (-rRNA; -miRNA hairpin) | white-inverted repeat mapping reads (18-23nt) | transposon mapping reads (18-23nt) | Study                          |
|----------------------------------------------------------------------------------------------------------------|-------------|--------------------|--------------------------------|----------------------------------------------|----------------------------------------------|-----------------------------------------------------|-----------------------------------------------------|-----------------------------------------------|------------------------------------|--------------------------------|
| wIR; <i>dicer-2</i> [null], <i>Act5C-Gal4/dicer-2</i> [null]; UAST-HA-Dicer-2- $\Delta$ Helicase/+             | 28,982,805  | 229,936            | 23,124,696                     | 23,840,321                                   | 715,625                                      | 23,366,119                                          | 241,423                                             | 7,801                                         | 38,461                             | This study.                    |
| wIR; <i>dicer-2</i> [null], <i>Act5C-Gal4/dicer-2</i> [null]; UAST-HA-Dicer-2- $\Delta$ CdsRBD/+               | 27,415,052  | 245,433            | 22,145,084                     | 22,828,396                                   | 683,312                                      | 22,365,355                                          | 220,271                                             | 34,952                                        | 35,498                             | This study.                    |
| wIR; <i>dicer-2</i> [null], <i>Act5C-Gal4/CyO</i> ; +                                                          | 23,547,141  | 683,361            | 17,157,315                     | 19,165,412                                   | 2,008,097                                    | 18,290,900                                          | 1,133,585                                           | 940,827                                       | 229,761                            | Kandasamy and Fukunaga (2016). |
| wIR; <i>dicer-2</i> [null], <i>Act5C-Gal4/dicer-2</i> [null]; +                                                | 26,130,170  | 170,603            | 21,380,781                     | 21,940,504                                   | 559,723                                      | 21,566,518                                          | 175,737                                             | 4,261                                         | 22,332                             | Kandasamy and Fukunaga (2016). |
| wIR; <i>dicer-2</i> [null], <i>Act5C-Gal4/dicer-2</i> [null]; UAST-HA-Dicer-2[Wild-type]/+                     | 53,337,727  | 789,604            | 40,850,471                     | 45,729,007                                   | 4,878,536                                    | 43,610,530                                          | 2,760,059                                           | 2,117,529                                     | 540,671                            | Kandasamy and Fukunaga (2016). |
| wIR; <i>dicer-2</i> [null], <i>Act5C-Gal4/dicer-2</i> [null]; UAST-HA-Dicer-2[H743A,R752A,R759A,R943A,R956A]/+ | 22,651,215  | 327,368            | 17,064,725                     | 18,529,415                                   | 1,464,690                                    | 17,947,400                                          | 882,675                                             | 676,569                                       | 177,335                            | Kandasamy and Fukunaga (2016). |
