# Supplementary material for: The C-terminal dsRNA-binding domain of Drosophila Dicer-2 is crucial for efficient and high-fidelity production of siRNA and loading of siRNA to Argonaute2
Source: PubMed Central journal article supplement — RNA. 2017 Jul;23(7):1139–53. doi: 10.1261/rna.059915.116 (PMC5473147; doi:10.1261/rna.059915.116), 2017-07
Supplement: supp_059915.116_Supplemental_Table_S2.pdf [file supp_059915.116_Supplemental_Table_S2.pdf]

**Supplemental Table S2. Sequencing statistics for small RNAs produced by recombinant Dicer-2 proteins in test tube.**

| Dicer-2 proteins                                        | Total reads | 104 bp dsRNA mapping reads (18-30 nt) | 104 bp dsRNA mapping reads (18 nt) | 104 bp dsRNA mapping reads (19 nt) | 104 bp dsRNA mapping reads (20 nt) | 104 bp dsRNA mapping reads (21 nt) | 104 bp dsRNA mapping reads (22 nt) | 104 bp dsRNA mapping reads (23 nt) | 104 bp dsRNA mapping reads (24 nt) | 104 bp dsRNA mapping reads (25 nt) | 104 bp dsRNA mapping reads (26 nt) | 104 bp dsRNA mapping reads (27 nt) | 104 bp dsRNA mapping reads (28 nt) | 104 bp dsRNA mapping reads (29 nt) | 104 bp dsRNA mapping reads (30 nt) | Study                          |
|---------------------------------------------------------|-------------|---------------------------------------|------------------------------------|------------------------------------|------------------------------------|------------------------------------|------------------------------------|------------------------------------|------------------------------------|------------------------------------|------------------------------------|------------------------------------|------------------------------------|------------------------------------|------------------------------------|--------------------------------|
| ΔHelicase                                               | 16,913,065  | 9,320,934                             | 1,470,992                          | 813,344                            | 1,182,623                          | 5,114,384                          | 609,218                            | 83,040                             | 25,595                             | 6,776                              | 3,638                              | 2,510                              | 3,374                              | 2,989                              | 2,451                              | This study.                    |
| ΔCdsRBD                                                 | 18,684,787  | 14,311,557                            | 1,472,267                          | 752,934                            | 1,213,229                          | 8,300,164                          | 2,154,920                          | 240,626                            | 52,234                             | 32,228                             | 25,041                             | 17,727                             | 17,867                             | 20,083                             | 12,237                             | This study.                    |
| Wild-type                                               | 16,469,750  | 13,780,908                            | 638,794                            | 574,670                            | 971,076                            | 10,442,217                         | 831,088                            | 97,147                             | 48,672                             | 42,131                             | 38,709                             | 30,778                             | 25,692                             | 23,328                             | 16,606                             | Kandasamy and Fukunaga (2016). |
| Phosphate-pocket mutant (H743A,R752A,R759A,R943A,R956A) | 19,327,744  | 13,286,799                            | 1,058,044                          | 1,103,229                          | 2,503,449                          | 7,269,774                          | 979,978                            | 139,941                            | 64,090                             | 54,724                             | 40,296                             | 26,814                             | 18,132                             | 15,116                             | 13,212                             | Kandasamy and Fukunaga (2016). |
