# Supplementary figures and images for: The C-terminal dsRNA-binding domain of Drosophila Dicer-2 is crucial for efficient and high-fidelity production of siRNA and loading of siRNA to Argonaute2
Source: PubMed Central journal article supplement — RNA. 2017 Jul;23(7):1139–53. doi: 10.1261/rna.059915.116 (PMC5473147; doi:10.1261/rna.059915.116), 2017-07

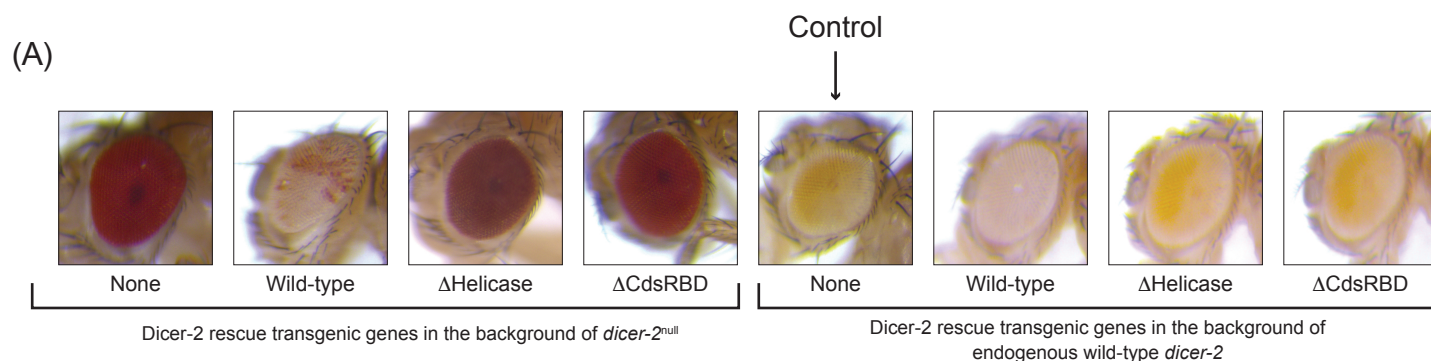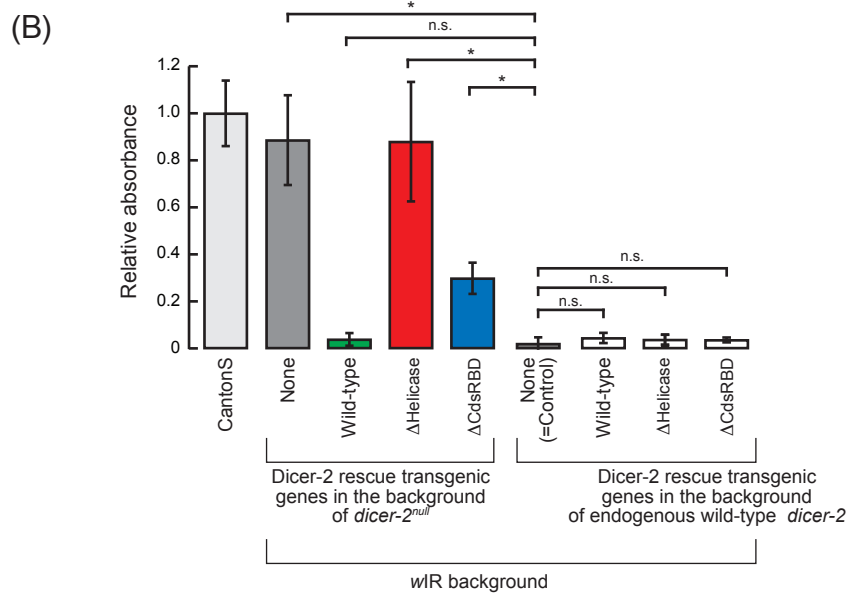

Supplement: supp_059915.116_FigureS1_wIRDcr2eyecolor.pdf [file supp_059915.116_FigureS1_wIRDcr2eyecolor.pdf]

(A)

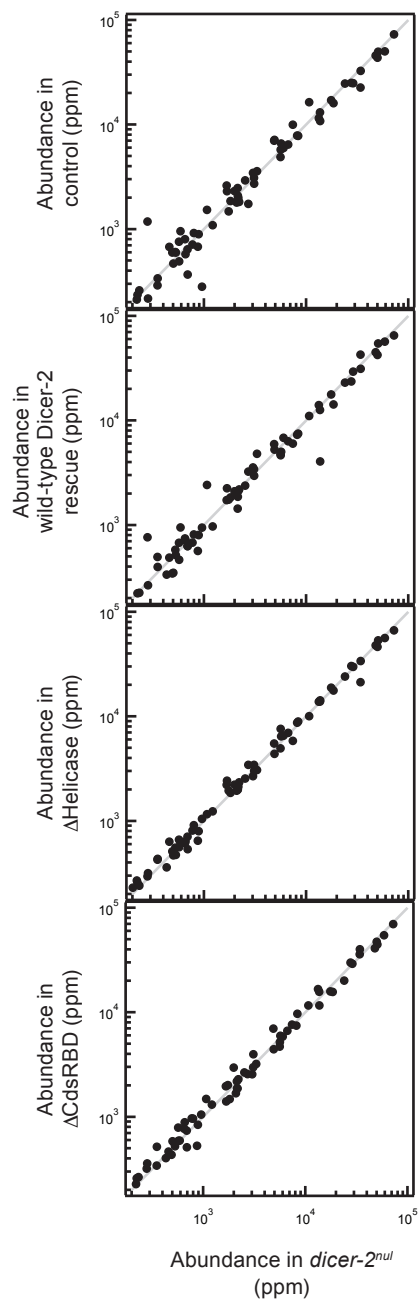

(B)

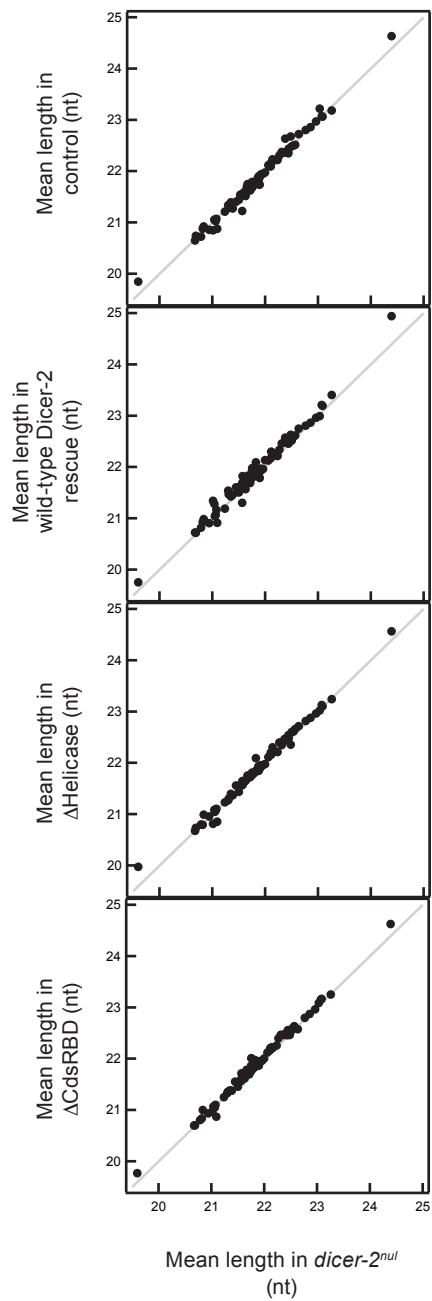

Supplement: supp_059915.116_FigureS2_wIRdcr2_miRNA.pdf [file supp_059915.116_FigureS2_wIRdcr2_miRNA.pdf]
